# Supplementary material for: BsmR degrades c-di-GMP to modulate biofilm formation of nosocomial pathogen Stenotrophomonas maltophilia
Source: PubMed Central journal article supplement (PMC5498567; doi:10.1038/s41598-017-04763-w), 2017-07-05
Supplement: 41598_2017_4763_MOESM1_ESM.pdf [file 41598_2017_4763_MOESM1_ESM.pdf]

**BsmR degrades c-di-GMP to modulate biofilm formation of nosocomial  
pathogen *Stenotrophomonas maltophilia***

Wei Liu<sup>1,2</sup>, Xiu-Qi Tian<sup>2,3</sup>, Jin-Wei Wei<sup>2,3</sup>, Li-Li Ding<sup>2,3</sup>, Wei Qian<sup>2</sup>, Zhong Liu<sup>1,\*</sup> & Fang-Fang  
Wang<sup>2,\*</sup>

<sup>1</sup>School of Pharmacy, Shanghai Jiao Tong University, Shanghai, 200240, China.

<sup>2</sup>State Key Laboratory of Plant Genomics, Institute of Microbiology, Chinese Academy of  
Sciences, Beijing, 100101, China.

<sup>3</sup>School of Life Sciences, University of Chinese Academy of Sciences, Beijing, 100049, China.

\*Correspondence authors

Correspondence and requests for materials should be addressed to F.F.W. (e-mail:  
wangff@im.ac.cn) or Z.L. (e-mail: liuzhong@sjtu.edu.cn)

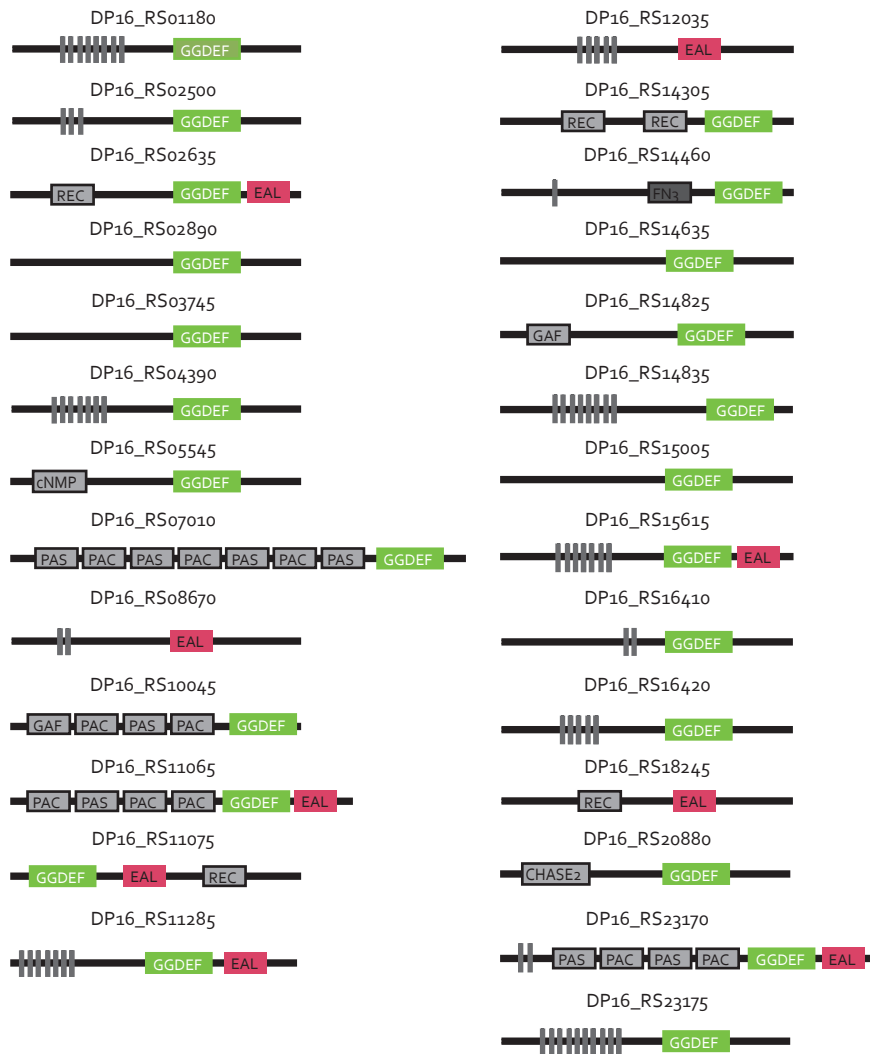

**Figure S1. Putative secondary structures of proteins predicted to be involved in c-di-GMP metabolism in *S. maltophilia* CGMCC 1.1788.** The Pfam database was searched using HMMer (E value  $\leq 1.0$ ). Domain names are according to the Pfam database. REC: response regulator receiver domain, PAS: PAS domain, cNMP: cyclic nucleotide-binding domain, GGDEF: GGDEF domain of diguanylate cyclase, EAL: EAL domain, PAC: PAS fold, GAF: GAF domain, CHASE2: CHASE2 domain, FN3: fibronectin type III domain. Gray vertical bars represent the predicted transmembrane helices. Protein names are listed.

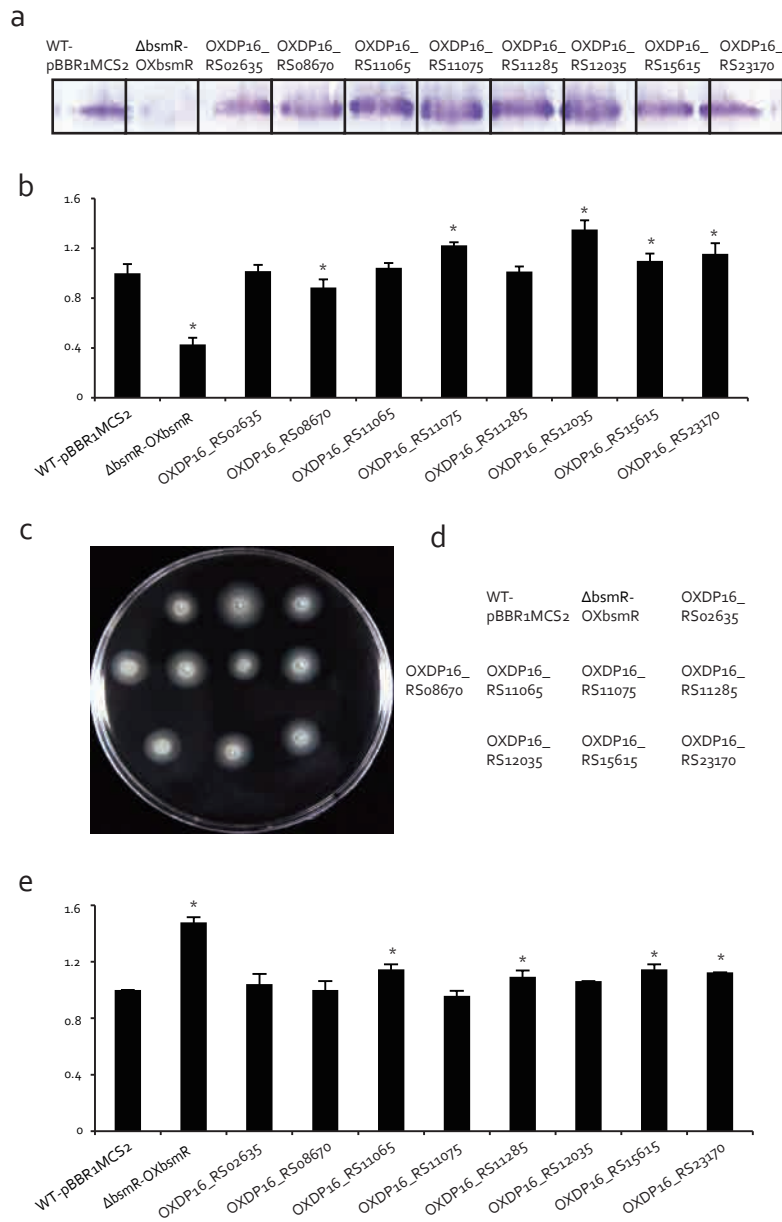

**Figure S2. *bsmR* has specificity in controlling bacterial swimming motility and biofilm formation.** (a) Biofilms formed by bacterial strains and evaluated by crystal violet staining. (b) Relative quantification of the biofilm in (a) at 590 nm using a Tecan Infinite 200 Pro scanner. The experiment was repeated 4 times. (c) Swimming motility of bacterial strains in rich NYG medium containing 0.15% agar. (d) The corresponding bacterial strains used in (c). (e) Relative quantification of the diameters of the bacterial swimming zones. The data are the average of three separate measurements. WT-pBBR1MCS2: wild-type strain containing the blank pBBR1MCS2 vector;  $\Delta$ bsmR-OXbsmR: *bsmR* in-frame deletion mutant containing the recombinant pBBR1MCS2-*bsmR* vector; OXDP16\_RS02635, OXDP16\_RS08670, OXDP16\_RS11065, OXDP16\_RS11075, OXDP16\_RS11285, OXDP16\_RS12035, OXDP16\_RS15615, OXDP16\_RS23170: wild type strains containing the recombinant vectors pBBR1MCS2-DP16\_RS02635, pBBR1MCS2-DP16\_RS08670, pBBR1MCS2-DP16\_RS11065, pBBR1MCS2-DP16\_RS11075, pBBR1MCS2-DP16\_RS11285, pBBR1MCS2-DP16\_RS12035, pBBR1MCS2-DP16\_RS15615, pBBR1MCS2-DP16\_RS23170, respectively. All data are representatives of at least triplicate repeatable experiments. All values are the means  $\pm$  standard deviations. \*  $p < 0.05$ , as determined by ANOVA.

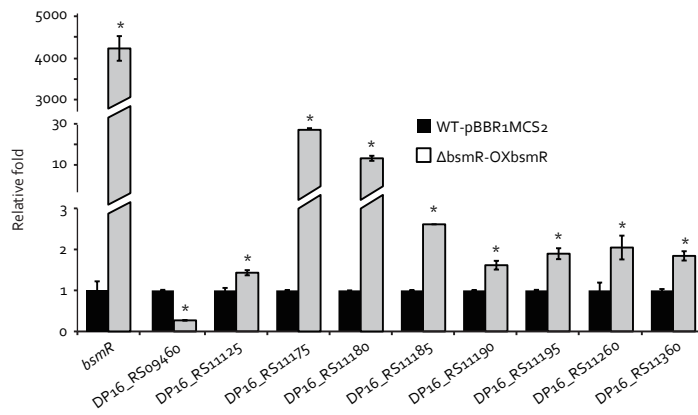

**Figure S3 Verification of RNA-seq results by qRT-PCR. Relative quantification of 10 genes randomly selected from the RNA-seq results, including *bsmR*.** Expression of the tmRNA was used as the loading control. Each value is the average of three replicates. Error bars represent the standard deviations (n = 3). \*p < 0.05, as determined by ANOVA. The qRT-PCR results are representatives of triplicate repeatable experiments.

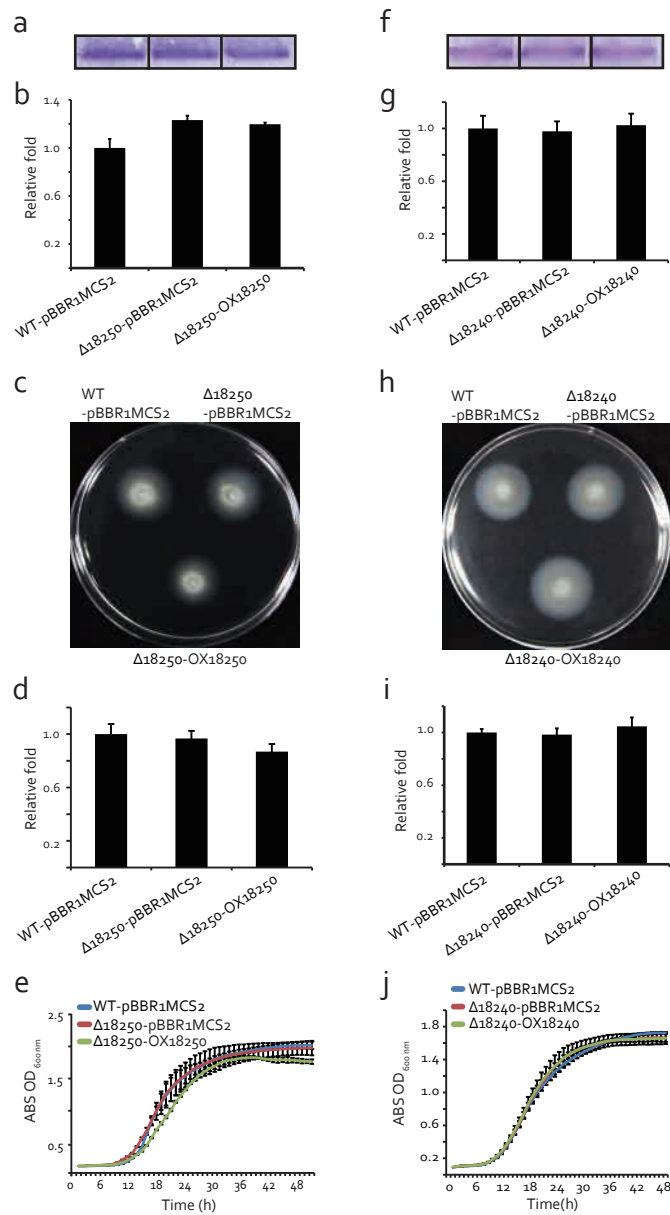

**Figure S4. *DP16\_RS18240* and *DP16\_RS18250* are not involved in controlling bacterial swimming motility and biofilm formation.** (a,f) Biofilm formation quantified by crystal violet staining. (b, g) Relative quantification of biofilm formation measured at 590 nm using a Tecan Infinite 200 Pro scanner. (c, h) Swimming motility analyses of bacterial strains on rich NYG medium plates containing 0.15% agar. (d,i) Relative quantification of bacterial swimming zone diameters. (e, j) Growth curves of bacterial strains grown on rich NYG medium at 28 °C. ABS: absorbance. WT-pBBR1MCS2: wild-type strain containing a blank pBBR1MCS2 vector;  $\Delta 18240$ -pBBR1MCS2 and  $\Delta 18250$ -pBBR1MCS2: blank pBBR1MCS2 vector-containing strains carrying the in-frame deletion of *DP16\_RS18240* and *DP16\_RS18250*, respectively;  $\Delta 18240$ -OX18240 and  $\Delta 18250$ -OX18250: strains overexpressing *DP16\_RS18240* and *DP16\_RS18250* in their in-frame deletion mutants, respectively; All data are representatives of at least triplicate repeatable experiments. The values are the means  $\pm$  standard deviation (n = 3). \* p < 0.05, as determined by ANOVA.

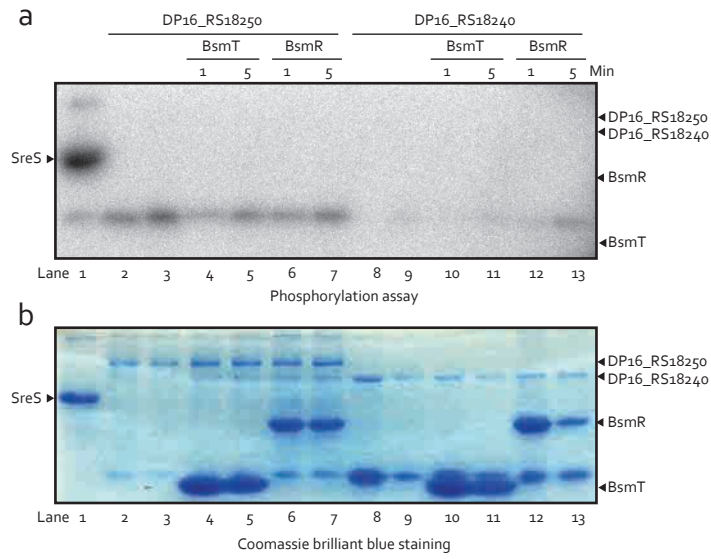

**Figure S5. No kinase activities of DP16\_RS18240 and DP16\_RS18250 were detected.** Membranes containing purified full-length histidine kinase were incubated at 28°C in reaction buffer containing [ $\gamma$ - $^{32}$ P] ATP. The reactions were stopped by the addition of SDS-loading buffer at the indicated time points. Proteins in the samples were separated by SDS-PAGE on 12% acrylamide gels and then subjected to autoradiography. Black arrows indicate the positions of the protein bands of DP16\_RS18240 and DP16\_RS18250. (a) and (c) are autoradiography images of the gels. (b) and (d) are coomassie brilliant blue staining images of the gels in (a) and (c), respectively. The experiments were repeated three times.

**Table S1. Bacterial strains and plasmids used in this study.**

| Strain and plasmid               | Genotype or description                                                                                                                          | Resource or reference |
|----------------------------------|--------------------------------------------------------------------------------------------------------------------------------------------------|-----------------------|
| <b>Strains</b>                   |                                                                                                                                                  |                       |
| <i>S. maltophilia</i> ATCC 13637 | Wild-type strain                                                                                                                                 | CGMCC 1.1788          |
| <i>E. coli</i> DH5 $\alpha$      | Host strain used for molecular cloning                                                                                                           | Lab collection        |
| <i>E. coli</i> BL21(DE3)         | Host strain used for protein expression                                                                                                          | Lab collection        |
| SMo64                            | WT, Wild-type strain containing blank pBBR1MCS2 vector                                                                                           | This study            |
| SMo65                            | $\Delta$ bsmT-pBBR1MCS2, in-frame deletion mutant of <i>DP16_RS18255</i> containing blank pBBR1MCS2 vector                                       | This study            |
| SMo66                            | $\Delta$ 18250-pBBR1MCS2, in-frame deletion mutant of <i>DP16_RS18250</i> containing blank pBBR1MCS2 vector                                      | This study            |
| SMo67                            | $\Delta$ bsmR-pBBR1MCS2, in-frame deletion mutant of <i>DP16_RS18245</i> containing blank pBBR1MCS2 vector                                       | This study            |
| SMo68                            | $\Delta$ 18240-pBBR1MCS2, in-frame deletion mutant of <i>DP16_RS18240</i> containing blank pBBR1MCS2 vector                                      | This study            |
| SMo69                            | $\Delta$ bsmT-OXbsmT, complementary strain with <i>bsmT</i> overexpressed in $\Delta$ bsmT mutant                                                | This study            |
| SMo70                            | $\Delta$ 18250-OX18250, complementary strain with <i>DP16_RS18250</i> overexpressed in $\Delta$ 18250 mutant                                     | This study            |
| SMo71                            | $\Delta$ bsmR-OXbsmR, complementary strain with <i>bsmR</i> overexpressed in $\Delta$ bsmR mutant                                                | This study            |
| SMo72                            | $\Delta$ 18240-OX18240, complementary strain with <i>DP16_RS18240</i> overexpressed in $\Delta$ 18240 mutant                                     | This study            |
| SMo73                            | $\Delta$ (bsmT-bsmR)-pBBR1MCS2, double in-frame deletion mutant of <i>DP16_RS18245</i> and <i>DP16_RS18255</i> containing blank pBBR1MCS2 vector | This study            |
| SMo74                            | $\Delta$ (bsmT-bsmR)-OXbsmT, epistasis analysis strain with <i>bsmT</i> overexpressed in $\Delta$ (bsmT-bsmR) mutant                             | This study            |
| SMo75                            | $\Delta$ (bsmT-bsmR)-OXbsmR, epistasis analysis strain with <i>bsmR</i> overexpressed in $\Delta$ (bsmT-bsmR) mutant                             | This study            |
| SMo76                            | $\Delta$ bsmR-OXbsmR <sup>D54A</sup> , complementary strain with <i>bsmR</i> <sup>D54A</sup> overexpressed in $\Delta$ bsmR mutant               | This study            |
| SMo77                            | $\Delta$ bsmR-OXbsmR <sup>D54E</sup> , complementary strain with <i>bsmR</i> <sup>D54E</sup> overexpressed in $\Delta$ bsmR mutant               | This study            |
| SMo78                            | $\Delta$ bsmR-OXbsmR <sup>E117A</sup> , complementary strain with <i>bsmR</i> <sup>E117A</sup> overexpressed in $\Delta$ bsmR mutant             | This study            |
| SMo79                            | SMo64 containing the pBBR-FRET plasmid                                                                                                           | This study            |
| SMo80                            | SMo67 containing the pBBR-FRET plasmid                                                                                                           | This study            |
| SMo81                            | SMo71 containing the pBBR-FRET plasmid                                                                                                           | This study            |
| SMo82                            | SMo78 containing the pBBR-FRET plasmid                                                                                                           | This study            |
| SMo83                            | Dose-bsmR, <i>bsmR</i> in-frame deletion mutant containing the recombinant vector MpBBR1MCS2:: <i>bsmR</i>                                       | This study            |
| SMo84                            | Dose-bsmR <sup>D54A</sup> , <i>bsmR</i> in-frame deletion mutant containing the recombinant vector MpBBR1MCS2:: <i>bsmR</i> <sup>D54A</sup>      | This study            |
| SMo85                            | Dose-bsmR <sup>D54E</sup> , <i>bsmR</i> in-frame deletion mutant containing the recombinant                                                      | This study            |

|                                    |                                                                                                                                                                                                   |                       |
|------------------------------------|---------------------------------------------------------------------------------------------------------------------------------------------------------------------------------------------------|-----------------------|
|                                    | vector MpBBR1MCS2:: <i>bsmR</i> <sup>D54E</sup>                                                                                                                                                   |                       |
| SM086                              | Dose- <i>bsmR</i> <sup>E117A</sup> , <i>bsmR</i> in-frame deletion mutant containing the recombinant vector MpBBR1MCS2:: <i>bsmR</i> <sup>E117A</sup>                                             | This study            |
| SM087                              | Dose- <i>bsmT</i> , <i>bsmR</i> in-frame deletion mutant containing the recombinant vector MpBBR1MCS2:: <i>bsmT</i>                                                                               | This study            |
| SM088                              | OXDP16_RS02635, overexpressing <i>DP16_RS02635</i> in WT strain                                                                                                                                   | This study            |
| SM089                              | OXDP16_RS08670, overexpressing <i>DP16_RS08670</i> in WT strain                                                                                                                                   | This study            |
| SM090                              | OXDP16_RS11065, overexpressing <i>DP16_RS11065</i> in WT strain                                                                                                                                   | This study            |
| SM091                              | OXDP16_RS11075, overexpressing <i>DP16_RS11075</i> in WT strain                                                                                                                                   | This study            |
| SM092                              | OXDP16_RS11285, overexpressing <i>DP16_RS11285</i> in WT strain                                                                                                                                   | This study            |
| SM093                              | OXDP16_RS12035, overexpressing <i>DP16_RS12035</i> in WT strain                                                                                                                                   | This study            |
| SM094                              | OXDP16_RS15615, overexpressing <i>DP16_RS15615</i> in WT strain                                                                                                                                   | This study            |
| SM095                              | OXDP16_RS23170, overexpressing <i>DP16_RS23170</i> in WT strain                                                                                                                                   | This study            |
| <b>Plasmids</b>                    |                                                                                                                                                                                                   |                       |
| pK18mob                            | Suicide vector to create a mutant by a single crossover; Kan <sup>r</sup>                                                                                                                         | Schäfer <i>et al.</i> |
| pK18mobsacB                        | Suicide vector to create a mutant by a double crossover; Kan <sup>r</sup>                                                                                                                         | Schäfer <i>et al.</i> |
| pET30a                             | Protein expression vector; Kan <sup>r</sup>                                                                                                                                                       | Novagen               |
| pBBR1MCS1                          | Broad-host-range vector used for genetic complementation; Chlo <sup>r</sup>                                                                                                                       | Lab collection        |
| pBBR1MCS2                          | Broad-host-range vector used for genetic complementation; Kan <sup>r</sup>                                                                                                                        | Lab collection        |
| pBBR- <i>bsmT</i>                  | pBBR1MCS2:: <i>bsmT</i> , genetic complementation vector                                                                                                                                          | This study            |
| pBBR-18250                         | pBBR1MCS2:: <i>18250</i> , genetic complementation vector                                                                                                                                         | This study            |
| pBBR- <i>bsmR</i>                  | pBBR1MCS2:: <i>bsmR</i> , genetic complementation vector                                                                                                                                          | This study            |
| pBBR-18240                         | pBBR1MCS2:: <i>18240</i> , genetic complementation plasmid                                                                                                                                        | This study            |
| pBBR- <i>bsmR</i> <sup>D54A</sup>  | pBBR1MCS2:: <i>bsmR</i> <sup>D54A</sup> , genetic complementation plasmid                                                                                                                         | This study            |
| pBBR- <i>bsmR</i> <sup>D54E</sup>  | pBBR1MCS2:: <i>bsmR</i> <sup>D54E</sup> , genetic complementation plasmid                                                                                                                         | This study            |
| pBBR- <i>bsmR</i> <sup>E117A</sup> | pBBR1MCS2:: <i>bsmR</i> <sup>E117A</sup> , genetic complementation plasmid                                                                                                                        | This study            |
| pBBR-FRET                          | pBBR1MCS1:: <i>cfp</i> – <i>ycgR</i> - <i>yfp</i> , genetic complementation plasmid                                                                                                               | This study            |
| MpBBR- <i>bsmR</i>                 | pBBR1MCS2:: <i>bsmR</i> with the <i>lacZ</i> promoter substituted by the arabinose <i>P</i> <sub>BAD</sub> promoter and its suppresser gene <i>araC</i> , dose expression plasmid                 | This study            |
| MpBBR- <i>bsmR</i> <sup>D54A</sup> | pBBR1MCS2:: <i>bsmR</i> <sup>D54A</sup> with the <i>lacZ</i> promoter substituted by the arabinose <i>P</i> <sub>BAD</sub> promoter and its suppresser gene <i>araC</i> , dose expression plasmid | This study            |
| MpBBR- <i>bsmR</i> <sup>D54E</sup> | pBBR1MCS2:: <i>bsmR</i> <sup>D54E</sup> with the <i>lacZ</i> promoter substituted by the arabinose <i>P</i> <sub>BAD</sub> promoter and its suppresser gene <i>araC</i> , dose expression plasmid | This study            |
| MpBBR- <i>bsmT</i>                 | pBBR1MCS2:: <i>bsmT</i> with the <i>lacZ</i> promoter substituted by the arabinose <i>P</i> <sub>BAD</sub> promoter and its suppresser gene <i>araC</i> , dose expression plasmid                 | This study            |
| pBBR-DP16_RS02635                  | pBBR1MCS2:: <i>DP16_RS02635</i> , overexpression plasmid                                                                                                                                          | This study            |
| pBBR-DP16_RS08670                  | pBBR1MCS2:: <i>DP16_RS08670</i> , overexpression plasmid                                                                                                                                          | This study            |
| pBBR-DP16_RS11065                  | pBBR1MCS2:: <i>DP16_RS11065</i> , overexpression plasmid                                                                                                                                          | This study            |
| pBBR-DP16_RS11075                  | pBBR1MCS2:: <i>DP16_RS11075</i> , overexpression plasmid                                                                                                                                          | This study            |
| pBBR-DP16_RS11285                  | pBBR1MCS2:: <i>DP16_RS11285</i> , overexpression plasmid                                                                                                                                          | This study            |
| pBBR-DP16_RS12035                  | pBBR1MCS2:: <i>DP16_RS12035</i> , overexpression plasmid                                                                                                                                          | This study            |
| pBBR-DP16_RS15615                  | pBBR1MCS2:: <i>DP16_RS15615</i> , overexpression plasmid                                                                                                                                          | This study            |
| pBBR-DP16_RS23170                  | pBBR1MCS2:: <i>DP16_RS23170</i> , overexpression plasmid                                                                                                                                          | This study            |
| pET30a- <i>bsmT</i>                | pET30a:: <i>bsmT</i> , for <i>BsmT</i> expression                                                                                                                                                 | This study            |



|              |                                                      |            |
|--------------|------------------------------------------------------|------------|
| pET30a-18250 | pET30a:: <i>18250</i> , for 18250 expression         | This study |
| pET30a- bsmR | pET30a:: <i>bsmR</i> , for BsmR expression           | This study |
| pET30a-18240 | pET30a:: <i>18240</i> , for 18240 expression         | This study |
| pET30a-FRET  | pET30a:: <i>yfp - ycgR - cfp</i> , for FRET analysis | This study |

---

**Table S2 Primers used in this study.**

| Primer   | Sequence (5'-3')                                                          | Purpose                                               |
|----------|---------------------------------------------------------------------------|-------------------------------------------------------|
| ΔbsmT    | AAGCTTATGACCACACGGATCCTC                                                  | Construction of <i>bsmT</i> in-frame deletion mutant  |
|          | GGTACCCTGTGGCCGGTCCGGGTC                                                  |                                                       |
|          | GGTACCGCGGCATGAGCGTGGGC                                                   |                                                       |
|          | GAATTCTCAGGCGAACAAACGAGGC                                                 |                                                       |
| OXbsmT   | AAGCTTATGACCACACGGATCCTC                                                  | For <i>bsmT</i> complementation                       |
|          | GAATTCTCAGGCGAACAAACGAGGC                                                 |                                                       |
| ProbsmT  | CATATGACCACACGGATCCTCATC                                                  | For BsmT expression                                   |
|          | AAGCTTGGCGAACAAACGAGGCCTG                                                 |                                                       |
| Δ18250   | AAGCTTATGCCGCGGAGGCCGCC                                                   | Construction of <i>18250</i> in-frame deletion mutant |
|          | GGATCCGAACGTGCCGTAGAAGCG                                                  |                                                       |
|          | GGATCCACCGATACGCGGATGAT                                                   |                                                       |
|          | GAATTCTCATGGCGGGTTCGGGTC                                                  |                                                       |
| OX18250  | AAGCTTATGCCGCGGAGGCCGCC                                                   | For <i>18250</i> complementation                      |
|          | GAATTCTCATGGCGGGTTCGGGTC                                                  |                                                       |
| Pro18250 | CATATGCCGCGGAGGCCGCCCTGT                                                  | For <i>18250</i> expression                           |
|          | AAGCTTGGCGGGTTCGGGTCGTCAG                                                 |                                                       |
| ΔbsmR    | AAGCTTATGACCACGCTGTCTCG                                                   | Construction of <i>bsmR</i> in-frame deletion mutant  |
|          | GGATCCGCGCCACCGCTTGGG                                                     |                                                       |
|          | GGATCCGCGCTGGCCAACAGCTGG                                                  |                                                       |
|          | GAATTCTCAGCTCAGGCGGCTCG                                                   |                                                       |
| OXbsmR   | AAGCTTATGACCACGCTGTCTCG                                                   | For <i>bsmR</i> complementation                       |
|          | GAATTCTCAGCTCAGGCGGCTCG                                                   |                                                       |
| ProbsmR  | CATATGACCCAGCGTCTCTGATC                                                   | For BsmR expression                                   |
|          | AAGCTTGCTCAGGCGGCTCGCGA                                                   |                                                       |
| D54A     | TACGACCTGGTGGTCAGTGCCCTGCTGATGCCCG<br>GCACTGACCACCAGGTCGTAGGGCTGGCAGGCA   | Construction of BsmR <sup>D54A</sup>                  |
| D54E     | TACGACCTGGTGGTCAGTGAGTCTGCTGATGCCCG<br>CTCACTGACCACCAGGTCGTAGGGCTGGCAGGCA | Construction of BsmR <sup>D54E</sup>                  |
| E177A    | AGGGCGGGTCGTGGCGGCCGCGCACTGGTGC GC<br>GCGGCCGCCACGACCCGCCCTGACTGCAGTACT   | Construction of BsmR <sup>E177A</sup>                 |
| Δ18240   | AAGCTTATGTTCCGCTTCCCCCGC                                                  | Construction of <i>18240</i> in-frame deletion mutant |
|          | GGATCCCCCTTCGCTGCCGAGC                                                    |                                                       |
|          | GGATCCGAGCTGGCACAGGATGGC                                                  |                                                       |
|          | GAATTCTCATGCGGGATCTCCTTG                                                  |                                                       |
| OX18240  | AAGCTTATGTTCCGCTTCCCCCGC                                                  | For <i>18240</i> complementation                      |
|          | GAATTCTCATGCGGGATCTCCTTG                                                  |                                                       |
| Pro18240 | CATATGTTCCGCTTCCCCCGCCTTC                                                 | For <i>18240</i> expression                           |
|          | AAGCTTGGCGGATCTCCTTGGCGC                                                  |                                                       |
| P18240   | GTGCCCCGCCAATGTCGG<br>GCAACGATGCTAGGAAGC                                  | P18240 probe for EMSA                                 |

|                   |                                                                                                                                                                                                                                                          |                                                                                                                                            |
|-------------------|----------------------------------------------------------------------------------------------------------------------------------------------------------------------------------------------------------------------------------------------------------|--------------------------------------------------------------------------------------------------------------------------------------------|
| OXfsnR            | AAGCTTGTGCGAGTTCTCATCG<br>GAATTCTTACTCCAGCTCGTGC                                                                                                                                                                                                         | For <i>fsnR</i> complementation                                                                                                            |
| QbsmT             | AAGCTTATGACCACACGGATCCTC<br>GGTACCCTGTGGCCGGTCCGGGTC                                                                                                                                                                                                     | For RT-PCR, <i>bsmT</i>                                                                                                                    |
| Q18250            | AAGCTTATGCCGCGGAGGCCGCC<br>AAGCGCTCCTGCTCGCGAAG                                                                                                                                                                                                          | For RT-PCR, <i>18250</i>                                                                                                                   |
| QbsmR             | AAGCTTATGACCACGCTGTCCTG<br>TGGATGAACTGGATGCCGTCC                                                                                                                                                                                                         | For RT-PCR, <i>bsmR</i>                                                                                                                    |
| Q18240            | AAGCTTATGTTCCGCTTCCCCGC<br>ATAGATCTGGGCCCTGTAGGC                                                                                                                                                                                                         | For RT-PCR, <i>18240</i>                                                                                                                   |
| S60T              | ATTGCACGCCAGCTGCAGCGCAG<br>ACTGGCGCGGACAGGCCGCGTCCG                                                                                                                                                                                                      | <i>18260-bsmT</i> , for operon structure analysis                                                                                          |
| ST50              | CGATGACCTGGTCAACCAGGAGG<br>CACGACCTCGAGGTCCAGCTCC                                                                                                                                                                                                        | <i>bsmT-18250</i> , for operon structure analysis                                                                                          |
| S50R              | GCCTGCTGGACGAAGAAGCACCG<br>ACACGCAGTGAGCGGCGAGCGAG                                                                                                                                                                                                       | <i>18250-bsmR</i> , for operon structure analysis                                                                                          |
| SR40              | GCGCTGCCTGGCCAGTGGCATGC<br>ATCCACGTCTTCGACGGCATCG                                                                                                                                                                                                        | <i>bsmR-18240</i> , for operon structure analysis                                                                                          |
| S4035             | GGATGCCACCTACACCGGTATC<br>CGGTCAGGCAGCGCAACAGCACC                                                                                                                                                                                                        | <i>18240-18235</i> , for operon structure analysis                                                                                         |
| FRET              | CATATGCACCACCACCACCACCTCTAAAGGTGAAGAA<br>ACTAGTTTTGTACAATTCATTACATCCC<br>ACTAGTAGTGGTTACAATGAGCAGTT<br>GGTACCTTCTCGCACTTTATTGCT<br>GGTACCTCTAAAGGTGAAGAATTATTC<br>AAGCTTTTATTGTACAATTCATCCATA                                                            | For FRET biosensor protein expression                                                                                                      |
| OXFRET            | AAGCTTATGTCTAAAGGTGAAG<br>GGATCCTTATTGTACAATTCA                                                                                                                                                                                                          | For FRET recombinant vector construction                                                                                                   |
| pBAD- <i>bsmR</i> | AAGCTTGCGTAAATATTTGTTAA<br>GAGCTCGCGTATTGGGCGCATGCAT<br>CCGTTGCAGCCCTAGATCGGC<br>GTTTCATCGGCAACAAAGCGCAG<br>GAGCTCACTCCAGAAAGGCCACCAAC<br>AAGCTTTCAATGGTGATGGTGATGATG<br>GAATTCAGGAGGACAGCTATGACCACACGGATC<br>AAGCTTTCAATGGTGATGGTGATGATGGGCGAACAACGAGGC | For<br>MpBBR1MCS2:: <i>bsmR</i> / <i>bsmR</i> <sup>D54A</sup> / <i>bsmR</i> <sup>D54E</sup> / <i>bsmR</i> <sup>E117A</sup><br>construction |
| pBAD- <i>bsmT</i> | GAATTCAGGAGGACAGCTATGACCACACGGATC<br>AAGCTTTCAATGGTGATGGTGATGATGGGCGAACAACGAGGC                                                                                                                                                                          | For MpBBR1MCS2:: <i>bsmT</i> construction                                                                                                  |
| OX02635           | AAGCTTATGCCGCAAACGAATCC<br>GAATTCTCAGAGCACCGCGTTGTG                                                                                                                                                                                                      | For pBBR1MCS2::DP16_RS02635 construction                                                                                                   |
| OX08670           | AAGCTTATGAGCCGGCTGCGCGTG<br>GAATTCCTACTCCACTCCCTCACG                                                                                                                                                                                                     | For pBBR1MCS2::DP16_RS08670 construction                                                                                                   |
| OX11065           | AAGCTTGTGGACCAAGGGATCATC<br>CAGGTCGCGCAGTACCAC                                                                                                                                                                                                           | For pBBR1MCS2::DP16_RS11065 construction                                                                                                   |

|         |                                            |                                          |
|---------|--------------------------------------------|------------------------------------------|
|         | GACCTGTTGCGCCGCTTC                         |                                          |
|         | GAGCTCTACCGCATCAGCATCAC                    |                                          |
| OX11075 | GGTACCATGTGGAATCCCAACCAG                   | For pBBR1MCS2::DP16_RS11075 construction |
|         | GAATTCTTACCGCAGCGGGCGATC                   |                                          |
| OX11285 | AAGCTTATGCTGGTAGGCACGTAC                   | For pBBR1MCS2::DP16_RS11285 construction |
|         | GAATTCCTACAGGGGGCGTTGTC                    |                                          |
| OX12035 | AAGCTTATGGATGCGCTTTCACGG                   | For pBBR1MCS2::DP16_RS12035 construction |
|         | GAATTCCTAGCTGGCGGCGAAGCG                   |                                          |
| OX15615 | AAGCTTATGACTGGCAGTTACAGT                   | For pBBR1MCS2::DP16_RS15615 construction |
|         | GAATTCTACCCACCCGGCGCAG                     |                                          |
| OX23170 | AAGCTTATGCAGGACGGGGTCAGGTCGACCACGCCGGGCAGG | For pBBR1MCS2::DP16_RS23170 construction |
|         | CTGCTCGGCAAGCAGGCG                         |                                          |
|         | GAATTCTTAGGCGGCCACCTCATC                   |                                          |

---

**Table S3. List of differentially expressed genes in  $\Delta$ bsmR-OXbsmR.**

| GeneID                                                                 | Definition                                            | Fold change<br>( $\Delta$ bsmR-OXbsmR/WT) |
|------------------------------------------------------------------------|-------------------------------------------------------|-------------------------------------------|
| <b>Pilli, flagellar assembly and other cell component protein (66)</b> |                                                       |                                           |
| DP16_RS03485                                                           | cell surface protein                                  | 2.620753861                               |
| DP16_RS06900                                                           | lipoprotein                                           | 0.393844830                               |
| DP16_RS08500                                                           | flagellar motor protein MotA                          | 2.503775451                               |
| DP16_RS08505                                                           | flagellar motor protein MotB                          | 2.283598409                               |
| DP16_RS11085                                                           | flagella protein                                      | 2.041179397                               |
| DP16_RS11095                                                           | flagellar basal body P-ring biosynthesis protein FlgA | 5.838669994                               |
| DP16_RS11105                                                           | flagellar biosynthesis protein FlgB                   | 5.251264406                               |
| DP16_RS11110                                                           | flagellar basal-body rod protein FlgC                 | 3.141381386                               |
| DP16_RS11115                                                           | flagellar basal body rod modification protein         | 4.316772157                               |
| DP16_RS11120                                                           | flagellar hook protein FlgE                           | 6.021594516                               |
| DP16_RS11125                                                           | flagellar basal body rod protein FlgF                 | 5.405713360                               |
| DP16_RS11130                                                           | flagellar basal body rod protein FlgG                 | 5.894276375                               |
| DP16_RS11135                                                           | flagellar basal body L-ring protein                   | 7.501806295                               |
| DP16_RS11140                                                           | flagellar biosynthesis protein FlgI                   | 4.893005067                               |
| DP16_RS11145                                                           | flagellar rod assembly protein FlgJ                   | 4.155605855                               |
| DP16_RS11150                                                           | flagellar hook protein FlgK                           | 3.800257136                               |
| DP16_RS11155                                                           | flagellar hook protein FlgL                           | 3.750903147                               |
| DP16_RS11160                                                           | flagellin                                             | 3.123928963                               |
| DP16_RS11165                                                           | flagellin                                             | 2.863606579                               |
| DP16_RS11170                                                           | flagellin                                             | 2.897257381                               |
| DP16_RS11175                                                           | flagellar hook protein FliD                           | 2.429428088                               |
| DP16_RS11180                                                           | flagellar protein FliS                                | 2.426500204                               |
| DP16_RS11185                                                           | flagellar FliT family protein                         | 2.712050070                               |
| DP16_RS11215                                                           | flagellar hook-basal body protein                     | 5.583730822                               |
| DP16_RS11220                                                           | flagellar MS-ring protein                             | 4.826981919                               |
| DP16_RS11225                                                           | flagellar motor switch protein FliG                   | 4.249440908                               |
| DP16_RS11230                                                           | flagellar assembly protein FliH                       | 3.852829863                               |
| DP16_RS11235                                                           | flagellar protein FliI                                | 4.537077292                               |
| DP16_RS11240                                                           | flagellar export protein FliJ                         | 3.375812833                               |
| DP16_RS11245                                                           | flagellar hook-length control protein                 | 3.663672842                               |
| DP16_RS11250                                                           | flagellar basal body protein FliL                     | 4.584437180                               |
| DP16_RS11255                                                           | flagellar motor switch protein FliM                   | 3.949480373                               |
| DP16_RS11260                                                           | flagellar motor switch protein FliN                   | 3.084075921                               |
| DP16_RS11265                                                           | flagellar protein                                     | 4.782401513                               |
| DP16_RS11270                                                           | flagellar biosynthesis protein flip                   | 4.002488115                               |
| DP16_RS11280                                                           | flagellar biosynthetic protein FliR                   | 3.438327885                               |
| DP16_RS11295                                                           | flagellar biosynthesis protein FliB                   | 2.016995089                               |
| DP16_RS11300                                                           | flagellar biosynthesis protein FliA                   | 3.055882858                               |
| DP16_RS11305                                                           | flagellar biosynthesis regulator FliF                 | 4.604767279                               |
| DP16_RS11335                                                           | flagellar motor protein                               | 2.856017625                               |

|                                                                      |                                                          |              |
|----------------------------------------------------------------------|----------------------------------------------------------|--------------|
| DP16_RS11340                                                         | flagellar motor protein MotD                             | 2.983672958  |
| DP16_RS11345                                                         | chromosome partitioning protein ParA                     | 2.708431395  |
| DP16_RS14620                                                         | pilus assembly protein                                   | 2.280954617  |
| DP16_RS17150                                                         | baseplate assembly protein                               | 4.480245426  |
| DP16_RS17155                                                         | phage baseplate protein                                  | 18.441940475 |
| DP16_RS17160                                                         | baseplate assembly protein                               | 10.056300680 |
| DP16_RS17165                                                         | phage tail protein I                                     | 4.843199119  |
| DP16_RS17170                                                         | tail protein                                             | 9.297551177  |
| DP16_RS17180                                                         | tail protein                                             | 22.274243430 |
| DP16_RS17185                                                         | phage major tail tube protein                            | 15.838573907 |
| DP16_RS17190                                                         | mu-like prophage FluMu gp41 family protein               | 14.824048077 |
| DP16_RS17195                                                         | phage tail tape measure protein                          | 12.262173814 |
| DP16_RS17200                                                         | tail protein                                             | 8.265879158  |
| DP16_RS17205                                                         | phage tail protein                                       | 3.783238519  |
| DP16_RS17210                                                         | phage tail protein                                       | 4.174392212  |
| DP16_RS17580                                                         | prophage tail length tape measure family protein         | 2.107125003  |
| DP16_RS18975                                                         | outer membrane beta-barrel domain protein                | 2.238334807  |
| DP16_RS19060                                                         | fimbrial protein                                         | 0.284304679  |
| DP16_RS19065                                                         | putative outer membrane usher protein mrkc precursor     | 0.331418589  |
| DP16_RS19900                                                         | phage portal protein                                     | 4.606301831  |
| DP16_RS20000                                                         | bacteriophage lambda head decoration family protein      | 3.651614535  |
| DP16_RS20005                                                         | minor capsid protein E                                   | 3.824424977  |
| DP16_RS20040                                                         | tail protein                                             | 3.479390051  |
| DP16_RS20055                                                         | tail protein                                             | 3.735009490  |
| DP16_RS20070                                                         | tail assembly protein                                    | 3.545261527  |
| DP16_RS22795                                                         | phage Tail Collar domain protein                         | 2.099690349  |
| <b>Transmembrane and membrane protein with unknown function (11)</b> |                                                          |              |
| DP16_RS00845                                                         | putative transmembrane protein                           | 2.484973335  |
| DP16_RS02830                                                         | putative transmembrane protein                           | 6.000955362  |
| DP16_RS05180                                                         | prokaryotic cytochrome b561 family protein               | 2.031739205  |
| DP16_RS08820                                                         | membrane protein                                         | 2.127377905  |
| DP16_RS10635                                                         | membrane protein                                         | 0.315777058  |
| DP16_RS11060                                                         | membrane protein                                         | 2.035291196  |
| DP16_RS17075                                                         | membrane protein                                         | 2.574052344  |
| DP16_RS20085                                                         | membrane protein [Proteobacteria]                        | 3.081099014  |
| DP16_RS20090                                                         | membrane protein                                         | 3.511483798  |
| DP16_RS21320                                                         | membrane protein                                         | 2.525809781  |
| DP16_RS23075                                                         | membrane protein                                         | 2.453918780  |
| <b>Transposase and restriction-modification system (2)</b>           |                                                          |              |
| DP16_RS20125                                                         | eco57I restriction-modification methylase family protein | 2.854714207  |
| DP16_RS22100                                                         | transposase                                              | 2.883008004  |
| <b>Secretion system (3)</b>                                          |                                                          |              |
| DP16_RS03490                                                         | two-partner secretion system protein                     | 2.248137463  |
| DP16_RS07195                                                         | type VI secretion protein                                | 2.194219672  |

|                               |                                                                            |             |
|-------------------------------|----------------------------------------------------------------------------|-------------|
| DP16_RS10575                  | type II secretory pathway, component ExeA                                  | 2.615761405 |
| <b>Transport protein (22)</b> |                                                                            |             |
| DP16_RS00865                  | ion channel                                                                | 2.462942428 |
| DP16_RS01390                  | TonB-dependent receptor                                                    | 2.547517710 |
| DP16_RS06080                  | TonB-dependent receptor                                                    | 2.921691992 |
| DP16_RS07245                  | MFS transporter                                                            | 0.416589669 |
| DP16_RS09395                  | nitrate/nitrite transporter NarK                                           | 0.316678136 |
| DP16_RS09425                  | major facilitator transporter                                              | 0.286289936 |
| DP16_RS09440                  | molybdate ABC transporter substrate-binding protein                        | 0.487259423 |
| DP16_RS10200                  | MFS transporter                                                            | 2.994672674 |
| DP16_RS10345                  | ABC transporter permease                                                   | 3.811013775 |
| DP16_RS10350                  | porin                                                                      | 3.053060701 |
| DP16_RS10370                  | MFS transporter                                                            | 2.679216534 |
| DP16_RS10415                  | PTS fructose transporter subunit IIA                                       | 0.327352716 |
| DP16_RS10630                  | iron permease                                                              | 0.454627095 |
| DP16_RS10640                  | cation transporter                                                         | 0.455655488 |
| DP16_RS10650                  | cation transporter                                                         | 0.472860506 |
| DP16_RS11720                  | major facilitator transporter                                              | 2.210819861 |
| DP16_RS13390                  | TonB-dependent receptor                                                    | 2.513105109 |
| DP16_RS15745                  | peptide transporter                                                        | 0.404927044 |
| DP16_RS17080                  | TonB-dependent receptor                                                    | 3.408569970 |
| DP16_RS17360                  | membrane transporter                                                       | 2.374241886 |
| DP16_RS17420                  | sulfate transporter                                                        | 2.457488269 |
| DP16_RS21995                  | ligand-gated channel                                                       | 0.492474694 |
| <b>Metabolism (75)</b>        |                                                                            |             |
| DP16_RS00300                  | cysteine synthase A                                                        | 0.459541564 |
| DP16_RS01000                  | alpha-1,2-mannosidase family protein                                       | 2.348126361 |
| DP16_RS02850                  | pyruvate dehydrogenase (acetyl-transferring) E1 component subunit<br>alpha | 2.225293009 |
| DP16_RS02855                  | 2-oxoisovalerate dehydrogenase subunit beta                                | 2.037352409 |
| DP16_RS02860                  | variant SH3 domain protein                                                 | 2.068334368 |
| DP16_RS02865                  | branched-chain alpha-keto acid dehydrogenase subunit E2                    | 2.717516743 |
| DP16_RS02890                  | diguanylate cyclase                                                        | 2.449191693 |
| DP16_RS03870                  | 2,5-didehydrogluconate reductase B                                         | 0.337449596 |
| DP16_RS04390                  | diguanylate cyclase                                                        | 3.034711284 |
| DP16_RS04950                  | glutamate synthase large subunit                                           | 0.491647582 |
| DP16_RS05700                  | enoyl-CoA hydratase                                                        | 2.252260234 |
| DP16_RS06770                  | L-lactate permease                                                         | 0.387369187 |
| DP16_RS08320                  | phasin family protein                                                      | 0.413588867 |
| DP16_RS09260                  | diacylglycerol kinase                                                      | 2.332878787 |
| DP16_RS09365                  | molybdopterin-guanine dinucleotide biosynthesis protein MoeC               | 0.296919319 |
| DP16_RS09370                  | molybdopterin molybdenumtransferase MoeA                                   | 0.355051605 |
| DP16_RS09375                  | putative molybdopterin converting factor subunit 1                         | 0.491189698 |
| DP16_RS09420                  | rotamase                                                                   | 0.298333224 |

|              |                                                                                                       |                |
|--------------|-------------------------------------------------------------------------------------------------------|----------------|
| DP16_RS09470 | glycogen-branching enzyme                                                                             | 0.498631966    |
| DP16_RS09880 | L1 family subclass B3 metallo-beta-lactamase                                                          | 0.351400400    |
| DP16_RS10150 | glyoxalase                                                                                            | 0.456840768    |
| DP16_RS10185 | 2-keto-3-deoxygluconate kinase                                                                        | 3.321112162    |
| DP16_RS10190 | lipase                                                                                                | 3.798991649    |
| DP16_RS10265 | PHB depolymerase esterase                                                                             | 2.405470497    |
| DP16_RS10330 | 4-oxalomesaconate tautomerase                                                                         | 2.415946298    |
| DP16_RS10335 | nitrate ABC transporter ATPase                                                                        | 3.131188714    |
| DP16_RS10340 | mannosyltransferase                                                                                   | 2.939897061    |
| DP16_RS10410 | 1-phosphofructokinase                                                                                 | 0.498132308    |
| DP16_RS11310 | cobyrrinic acid a,c-diamide synthase                                                                  | 2.951778863    |
| DP16_RS11400 | chemoreceptor glutamine deamidase CheD                                                                | 2.123279103    |
| DP16_RS11455 | betaine-aldehyde dehydrogenase                                                                        | 0.363677485    |
| DP16_RS11705 | beta-mannosidase                                                                                      | 3.007720472    |
| DP16_RS11710 | N-acylglucosamine 2-epimerase                                                                         | 2.724971851    |
| DP16_RS11715 | fructokinase                                                                                          | 2.835752241    |
| DP16_RS11785 | bifunctional phosphoribosyl-AMP<br>cyclohydrolase/phosphoribosyl-ATP diphosphatase                    | 0.246254946    |
| DP16_RS11790 | imidazole glycerol phosphate synthase cyclase subunit                                                 | 0.127700975    |
| DP16_RS11795 | 1-(5-phosphoribosyl)-5-[(5-phosphoribosylamino)<br>methylideneamino]imidazole-4-carboxamide isomerase | 0.147268194    |
| DP16_RS11800 | imidazole glycerol phosphate synthase subunit HisH                                                    | 0.231537231    |
| DP16_RS11805 | bifunctional imidazole glycerol-phosphate dehydratase/histidinol<br>phosphatase                       | 0.280055192    |
| DP16_RS11810 | histidinol-phosphate transaminase                                                                     | 0.294877186    |
| DP16_RS11815 | histidinol dehydrogenase                                                                              | 0.443030227    |
| DP16_RS11820 | ATP phosphoribosyltransferase                                                                         | 0.436133828    |
| DP16_RS13530 | carbon storage regulator                                                                              | 2.009278707    |
| DP16_RS14185 | glutathione S-transferase                                                                             | 2.015208782    |
| DP16_RS15035 | alpha/beta hydrolase                                                                                  | 2.019359987    |
| DP16_RS15055 | phosphatase                                                                                           | 2.524646349    |
| DP16_RS15060 | Diaminobutyrate-2-oxoglutarate aminotransferase                                                       | 2.077583577    |
| DP16_RS15085 | type I methionyl aminopeptidase                                                                       | 0.448587741    |
| DP16_RS15455 | DNA primase traC                                                                                      | 2.667308905    |
| DP16_RS15480 | adenine methyltransferase                                                                             | 12.366258814   |
| DP16_RS15515 | catalase                                                                                              | 0.412635332    |
| DP16_RS16270 | phosphoribosyl-dephospho-CoA transferase                                                              | 3.169513160    |
| DP16_RS16275 | triphosphoribosyl-dephospho-CoA synthase MdcB                                                         | 4.121058063    |
| DP16_RS16280 | malonate decarboxylase subunit epsilon                                                                | 3.282040254    |
| DP16_RS16285 | Dicarboxylate carrier MatC domain protein                                                             | 3.357663301    |
| DP16_RS17100 | integrase                                                                                             | 2.177882406    |
| DP16_RS17135 | glycoside hydrolase                                                                                   | 7.918573311    |
| DP16_RS17465 | integrase core domain protein                                                                         | 2.645454049    |
| DP16_RS18245 | diguanylate phosphodiesterase                                                                         | 2444.253612136 |



|                                         |                                                          |             |
|-----------------------------------------|----------------------------------------------------------|-------------|
| DP16_RS19860                            | resolvase                                                | 4.692493189 |
| DP16_RS19890                            | AAA domain protein                                       | 6.663328858 |
| DP16_RS19905                            | isoleucyl-tRNA synthetase                                | 5.893245907 |
| DP16_RS19930                            | DNA methylase N-4                                        | 3.422511827 |
| DP16_RS19935                            | DNA methylase N-4                                        | 3.516898716 |
| DP16_RS19970                            | terminase                                                | 4.805844658 |
| DP16_RS19995                            | peptidase S49 family protein                             | 4.070984505 |
| DP16_RS20095                            | glycoside hydrolase                                      | 3.717412941 |
| DP16_RS20100                            | ATP-dependent Lon protease                               | 3.387595774 |
| DP16_RS20105                            | alkaline phosphatase                                     | 2.633160194 |
| DP16_RS20130                            | ATPase                                                   | 2.365439361 |
| DP16_RS20165                            | ATP-binding protein                                      | 2.734425895 |
| DP16_RS21310                            | BioH protein                                             | 2.017890934 |
| DP16_RS21425                            | methylisocitrate lyase                                   | 2.636025134 |
| DP16_RS21980                            | L2 family class A beta-lactamase                         | 0.405409761 |
| DP16_RS23120                            | nucleotidyltransferase[Vibrioparahaemolyticu]            | 2.410683187 |
| <b>Oxidation-Reduction process (24)</b> |                                                          |             |
| DP16_RS03125                            | oxidoreductase                                           | 0.398825283 |
| DP16_RS04005                            | cioB                                                     | 0.490516895 |
| DP16_RS05560                            | dehydrogenase                                            | 2.005112423 |
| DP16_RS05685                            | methylmalonate-semialdehyde dehydrogenase (acylating)    | 2.043399616 |
| DP16_RS05705                            | 3-hydroxyisobutyrate dehydrogenase                       | 2.860785578 |
| DP16_RS05710                            | Organic hydroperoxide resistance protein                 | 2.199058904 |
| DP16_RS06755                            | D-lactate dehydrogenase                                  | 0.296897506 |
| DP16_RS06760                            | alpha-hydroxy-acid oxidizing enzyme                      | 0.346768989 |
| DP16_RS09095                            | ribonucleotide-diphosphate reductase                     | 0.265130803 |
| DP16_RS09100                            | ribonucleotide-diphosphate reductase subunit beta        | 0.420533949 |
| DP16_RS09105                            | flavodoxin                                               | 0.388560409 |
| DP16_RS09400                            | nitrate reductase subunit alpha                          | 0.321956215 |
| DP16_RS09405                            | nitrate reductase subunit beta                           | 0.380763983 |
| DP16_RS09410                            | nitrate reductase molybdenum cofactor assembly chaperone | 0.346182978 |
| DP16_RS09415                            | nitrate reductase A subunit gamma                        | 0.356190415 |
| DP16_RS09430                            | coproporphyrinogen III oxidase                           | 0.445002776 |
| DP16_RS09455                            | sulfite reductase subunit alpha                          | 0.204030608 |
| DP16_RS10195                            | oxidoreductase                                           | 2.986295967 |
| DP16_RS10360                            | 1,4-beta-D-glucan glucohydrolase                         | 3.494442378 |
| DP16_RS12965                            | putative short-chain dehydrogenase/reductase             | 0.462773765 |
| DP16_RS13310                            | quercetin 2,3-dioxygenase                                | 0.485912453 |
| DP16_RS16240                            | malate:quinone oxidoreductase                            | 0.403359989 |
| DP16_RS16260                            | biotin-independent malonate decarboxylase subunit beta   | 2.198109909 |
| DP16_RS18460                            | peroxiredoxin                                            | 0.290012243 |
| <b>signal transduction (20)</b>         |                                                          |             |
| DP16_RS01505                            | rod shape-determining protein RodA                       | 2.402922329 |
| DP16_RS06995                            | chemotaxis protein                                       | 2.638716749 |

|                                      |                                                  |             |
|--------------------------------------|--------------------------------------------------|-------------|
| DP16_RS09460                         | PAS sensor domain-containing protein             | 0.193198626 |
| DP16_RS11055                         | chemotaxis protein                               | 2.232129462 |
| DP16_RS11065                         | histidine kinase                                 | 2.450562637 |
| DP16_RS11100                         | chemotaxis protein CheW                          | 2.537069212 |
| DP16_RS11205                         | two-component system response regulator          | 2.279029760 |
| DP16_RS11320                         | chemotaxis regulatory protein CheY               | 2.912407603 |
| DP16_RS11325                         | chemotaxis protein                               | 2.557752053 |
| DP16_RS11330                         | chemotaxis protein CheA                          | 2.840357818 |
| DP16_RS11350                         | chemotaxis protein CheW                          | 2.299734061 |
| DP16_RS11355                         | STAS domain protein                              | 2.471677223 |
| DP16_RS11360                         | Fis family transcriptional regulator             | 2.170466428 |
| DP16_RS11370                         | chemotaxis protein                               | 2.457488269 |
| DP16_RS11390                         | chemotaxis protein                               | 2.445530755 |
| DP16_RS19215                         | cold-shock protein                               | 2.005290529 |
| DP16_RS19775                         | serine/threonine kinase                          | 0.490781281 |
| DP16_RS21040                         | histidine kinase                                 | 2.348615962 |
| DP16_RS22540                         | chemotaxis protein                               | 2.072610253 |
| DP16_RS22960                         | chemotaxis protein                               | 2.888572399 |
| DP16_RS20150                         | WYL domain-containing protein                    | 2.006811219 |
| <b>transcription regulation (15)</b> |                                                  |             |
| DP16_RS05675                         | RpoH suppressor                                  | 2.095497814 |
| DP16_RS06950                         | heavy metal-responsive transcriptional regulator | 0.477310873 |
| DP16_RS09320                         | AraC family transcriptional regulator            | 2.352540132 |
| DP16_RS09435                         | transcriptional regulator                        | 0.374666962 |
| DP16_RS10595                         | transcriptional regulator                        | 0.469981898 |
| DP16_RS11195 (FsnR)                  | DNA-binding response regulator                   | 1.896370759 |
| DP16_RS11200                         | RNA polymerase sigma-54 factor                   | 3.085734337 |
| DP16_RS11315                         | RNA polymerase sigma factor FliA                 | 2.589700654 |
| DP16_RS11450                         | transcriptional regulator BetI                   | 0.404102825 |
| DP16_RS12140                         | transcriptional regulator                        | 2.777110984 |
| DP16_RS17125                         | helix-turn-helix, Pqs domain protein             | 7.408033716 |
| DP16_RS19840                         | transcriptional regulator                        | 3.768529572 |
| DP16_RS19850                         | OST-HTH/LOTUS domain protein                     | 3.251058124 |
| DP16_RS20175                         | transcriptional regulator                        | 3.670362282 |
| DP16_RS22055                         | RNA polymerase subunit sigma                     | 1.89637076  |
| <b>Hypothetical protein (110)</b>    |                                                  |             |
| DP16_RS02515                         | hypothetical protein                             | 4.219766041 |
| DP16_RS02530                         | hypothetical protein                             | 3.014118601 |
| DP16_RS02805                         | hypothetical protein                             | 2.923498041 |
| DP16_RS02825                         | hypothetical protein                             | 2.795315917 |
| DP16_RS02870                         | hypothetical protein                             | 2.507397213 |
| DP16_RS03250                         | hypothetical protein                             | 2.399579675 |
| DP16_RS03355                         | unnamed protein product                          | 2.243843847 |
| DP16_RS04680                         | hypothetical protein WJ66_02118                  | 2.021444810 |

|              |                                   |                |
|--------------|-----------------------------------|----------------|
| DP16_RS05555 | hypothetical protein              | 3.268250169    |
| DP16_RS05730 | hypothetical protein              | 4.454197488    |
| DP16_RS05735 | hypothetical protein              | 2.344314467    |
| DP16_RS05990 | hypothetical protein              | 0.291679347    |
| DP16_RS05995 | hypothetical protein              | 0.411057879    |
| DP16_RS06230 | hypothetical protein              | 3.683922734    |
| DP16_RS06620 | DUF1338 domain-containing protein | 2.126196077    |
| DP16_RS06665 | hypothetical protein              | 2.738159298    |
| DP16_RS10590 | hypothetical protein              | 0.478240151    |
| DP16_RS10655 | hypothetical protein              | 0.141073791    |
| DP16_RS11190 | hypothetical protein              | 2.893410583    |
| DP16_RS11385 | hypothetical protein              | 2.168537731    |
| DP16_RS11415 | hypothetical protein              | 2.290065868    |
| DP16_RS13495 | hypothetical protein              | 2.666304647    |
| DP16_RS15430 | hypothetical protein              | 2.780681913    |
| DP16_RS15450 | hypothetical protein              | 2.095910285    |
| DP16_RS15470 | hypothetical protein              | 5.313779459    |
| DP16_RS15475 | hypothetical protein              | 12.503010491   |
| DP16_RS15485 | hypothetical protein              | 14.065886803   |
| DP16_RS15760 | hypothetical protein              | 9999.396513345 |
| DP16_RS16500 | hypothetical protein              | 2.625632203    |
| DP16_RS17090 | hypothetical protein              | 4.264419650    |
| DP16_RS17095 | hypothetical protein              | 3.812669517    |
| DP16_RS17110 | hypothetical protein              | 10.971391706   |
| DP16_RS17115 | hypothetical protein              | 5.595097195    |
| DP16_RS17130 | hypothetical protein              | 10.002408393   |
| DP16_RS17140 | hypothetical protein              | 9.168874360    |
| DP16_RS17145 | hypothetical protein              | 6.826643728    |
| DP16_RS17175 | hypothetical protein              | 5.697394553    |
| DP16_RS17415 | hypothetical protein              | 3.245973878    |
| DP16_RS17475 | hypothetical protein              | 8697.699925809 |
| DP16_RS17480 | hypothetical protein              | 18.285652844   |
| DP16_RS17490 | hypothetical protein              | 2.220929495    |
| DP16_RS17535 | hypothetical protein              | 3.802999024    |
| DP16_RS17540 | hypothetical protein              | 3.779319080    |
| DP16_RS17545 | hypothetical protein              | 3.312785362    |
| DP16_RS17550 | hypothetical protein              | 2.545255707    |
| DP16_RS17555 | hypothetical protein              | 3.600867022    |
| DP16_RS17560 | hypothetical protein              | 6.043121738    |
| DP16_RS17570 | hypothetical protein              | 2.117966863    |
| DP16_RS17575 | hypothetical protein              | 5.110605538    |
| DP16_RS17615 | hypothetical protein              | 2.487578129    |
| DP16_RS17725 | hypothetical protein              | 2.082623550    |
| DP16_RS17885 | hypothetical protein              | 0.403924017    |

|              |                                           |             |
|--------------|-------------------------------------------|-------------|
| DP16_RS19080 | hypothetical protein                      | 7.271649194 |
| DP16_RS19300 | hypothetical protein                      | 2.018011237 |
| DP16_RS19830 | hypothetical protein                      | 4.955372047 |
| DP16_RS19835 | hypothetical protein                      | 4.542568420 |
| DP16_RS19845 | hypothetical protein                      | 4.092966642 |
| DP16_RS19855 | hypothetical protein                      | 4.087068996 |
| DP16_RS19865 | hypothetical protein                      | 4.002488115 |
| DP16_RS19870 | hypothetical protein                      | 3.865171473 |
| DP16_RS19875 | hypothetical protein                      | 5.224472241 |
| DP16_RS19880 | hypothetical protein                      | 5.811719121 |
| DP16_RS19885 | hypothetical protein                      | 7.315517020 |
| DP16_RS19895 | hypothetical protein                      | 6.497283603 |
| DP16_RS19900 | hypothetical protein                      | 7.527013977 |
| DP16_RS19910 | hypothetical protein                      | 7.022524226 |
| DP16_RS19915 | hypothetical protein                      | 8.168343091 |
| DP16_RS19920 | hypothetical protein                      | 6.095217615 |
| DP16_RS19925 | hypothetical protein                      | 9.299114053 |
| DP16_RS19940 | hypothetical protein                      | 2.719404782 |
| DP16_RS19960 | hypothetical protein                      | 2.431140929 |
| DP16_RS19965 | hypothetical protein                      | 4.965684280 |
| DP16_RS19975 | hypothetical protein                      | 3.362766213 |
| DP16_RS19980 | hypothetical protein                      | 3.481054000 |
| DP16_RS19985 | hypothetical protein                      | 3.000722518 |
| DP16_RS20010 | hypothetical protein                      | 5.740018453 |
| DP16_RS20015 | hypothetical protein                      | 4.568064190 |
| DP16_RS20020 | hypothetical protein                      | 3.681952722 |
| DP16_RS20025 | hypothetical protein                      | 2.849476423 |
| DP16_RS20030 | hypothetical protein [Cupriavidus sp. WS] | 4.269410347 |
| DP16_RS20035 | hypothetical protein                      | 4.646641212 |
| DP16_RS20045 | hypothetical protein                      | 2.885775486 |
| DP16_RS20050 | hypothetical protein                      | 3.325154083 |
| DP16_RS20060 | Uncharacterized conserved protein         | 3.073656746 |
| DP16_RS20065 | hypothetical protein DP16_399             | 4.571413211 |
| DP16_RS20075 | hypothetical protein                      | 4.665185790 |
| DP16_RS20080 | hypothetical protein                      | 3.697318817 |
| DP16_RS20110 | hypothetical protein                      | 2.693235690 |
| DP16_RS20115 | hypothetical protein                      | 3.212730087 |
| DP16_RS20120 | hypothetical protein                      | 3.392490015 |
| DP16_RS20135 | hypothetical protein [Proteobacteria]     | 2.271809896 |
| DP16_RS20140 | hypothetical protein                      | 2.245504519 |
| DP16_RS20155 | hypothetical protein                      | 2.879037700 |
| DP16_RS20160 | hypothetical protein                      | 2.191725952 |
| DP16_RS20170 | hypothetical protein                      | 3.107365843 |
| DP16_RS20180 | hypothetical protein                      | 4.447093504 |

|              |                                |             |
|--------------|--------------------------------|-------------|
| DP16_RS20185 | hypothetical protein           | 3.454779215 |
| DP16_RS21305 | conserved hypothetical protein | 2.425855840 |
| DP16_RS22040 | hypothetical protein DP16_373  | 9.064682606 |
| DP16_RS22045 | hypothetical protein           | 2.711111969 |
| DP16_RS22050 | hypothetical protein           | 3.553844830 |
| DP16_RS22060 | hypothetical protein           | 3.733210208 |
| DP16_RS22165 | hypothetical protein           | 2.664331998 |
| DP16_RS22345 | hypothetical protein           | 4.376053672 |
| DP16_RS22350 | hypothetical protein           | 2.219284362 |
| DP16_RS22365 | hypothetical protein           | 2.416447220 |
| DP16_RS23000 | hypothetical protein           | 2.739917533 |
| DP16_RS23215 | hypothetical protein           | 8.439532082 |
| DP16_RS23245 | hypothetical protein           | 4.013466368 |
| DP16_RS23295 | hypothetical protein           | 3.264674962 |

---
